# Supplementary material for: A Cu-functionalized MOF and multi-walled carbon nanotube composite modified electrode for the simultaneous determination of hydroquinone and catechol
Source: Royal Society of Chemistry journal article supplement (doi:10.1039/d2ay01230h), 2022-01-01
Supplement: d2ay01230h1.pdf [file d2ay01230h1.pdf]

## Supporting Information

# **Cu-functionalized MOF and multi-walled carbon nanotube composite modified electrode for the simultaneous determination of hydroquinone and catechol**

Hong-jing Zhang, Xin Zou, Wen-yi Chen, Qian Sun\*, En-qing Gao

Department of chemistry, School of Chemistry and Molecular Engineering, East China Normal University, Shanghai 200241, P. R. China

## **Method and Apparatus**

The experiments employed ultra-pure water.

Mixing 0.100 M  $\text{NaH}_2\text{PO}_4$  and 0.100 M  $\text{Na}_2\text{HPO}_4$  with the proper ratio prepared the phosphate-buffered solutions (PBS) at various pH values.

The chemicals Powder X-ray diffraction (PXRD) was performed on a Bruker D8 ADVANCE. FT-IR spectroscopy (Nicolet NEXUS670 spectrometer), inductively coupled plasma optical emission spectrometer (ICP-OES, Thermo Fisher ICAP-7200), scanning electron microscopy (SEM, Hitachi S-4800), transmission electron microscopy (TEM, JEOL-2100F), thermogravimetric analysis (TGA, Mettler Toledo TGA/SDTA851 e/5FL1100), and X-ray photoelectron spectrometer (XPS, Thermo Fisher 250 XI) were used to characterize the materials. Perform electrochemical experiments, including CV, EIS, and DPV, were measured using CHI 660E

electrochemical workstation (Shanghai Chen-Hua instrument Co., LTD).

### **Synthesis of UiO-bpydc**

Based on the literature report<sup>1</sup>, direct assembly of  $ZrCl_4$  and  $H_2bpydc$  synthesized UiO-bpydc under a solvothermal procedure. Briefly, 70 mg  $ZrCl_4$  and 61.9 mg  $H_2bpydc$  were mixed in DMF and acetic acid (10 ml, v/v = 5:1) solution; after vigorous stirring for 30 mins and sonication for 20 mins, transfer the mixture into a 20 ml Teflon lined stainless steel autoclave and heat to 120°C for 24 hours. The cooled product was separated and washed with DMF, filtered and dried in a vacuum oven (150 °C, five hours), and finally obtained white flake crystals (yield: 75.1%).

### **Synthesis of UiO-bpydc-Cu**

UiO-bpydc-Cu was synthesized according to the literature<sup>2</sup>. UiO-bpydc (100 mg, 0.047 mmol) and  $Cu(OAc)_2 \cdot H_2O$  (126 mg, 0.564 mmol) were mixed in 5.0 ml acetonitrile, dissolved under sonication for 30 mins, then heated in a 65 °C oil bath, refluxed for 24 hours. After filtration, wash the product with acetonitrile a few times until the last filtrate is clear and limpid. Dry the separated solid product in a 60°C vacuum oven overnight to obtain a light blue powder. ICP measured the copper site incorporation as about 10.43 wt%.

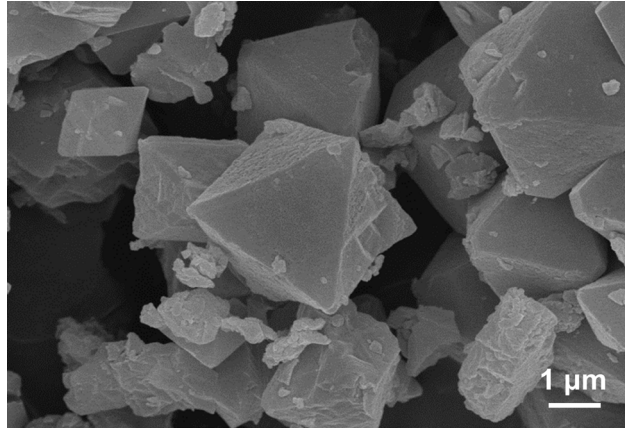

**Figure S1** (a) TEM images of UiO-bpydc-Cu/MWCNTs.

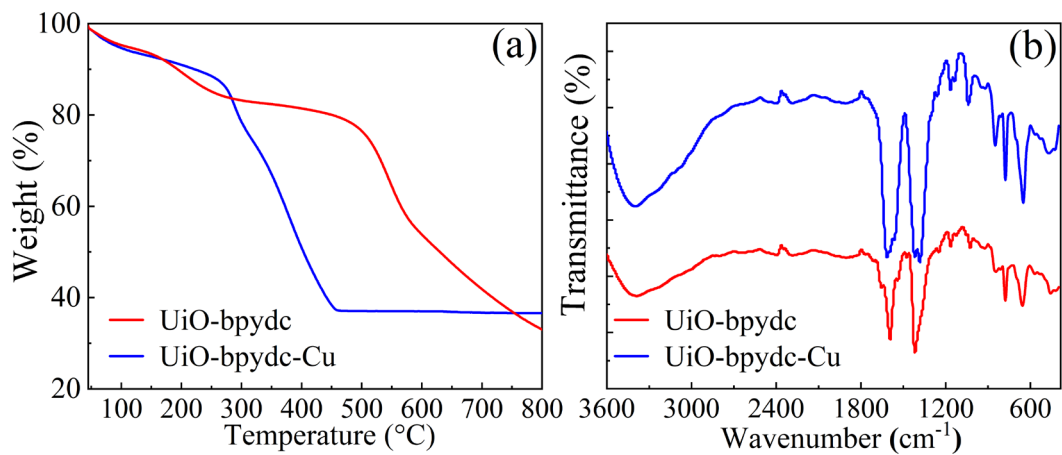

**Figure S2** (a) TGA images and (b) FT-IR spectra of UiO-bpydc (red line) and UiO-bpydc-Cu (blue line)

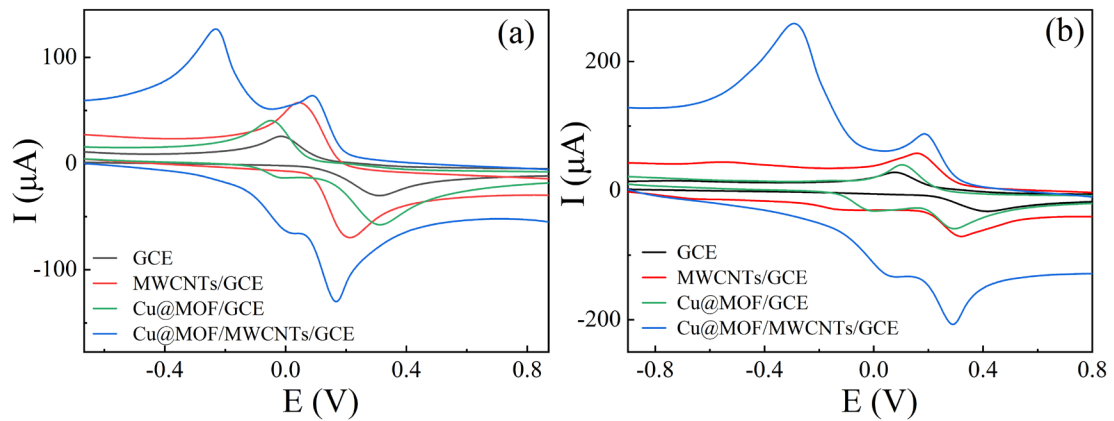

**Figure S3.** CV curves on various electrodes in PBS solution (pH 6.0) containing 2 mM  $\mu$ M HQ (a) or 2 mM CT (b).

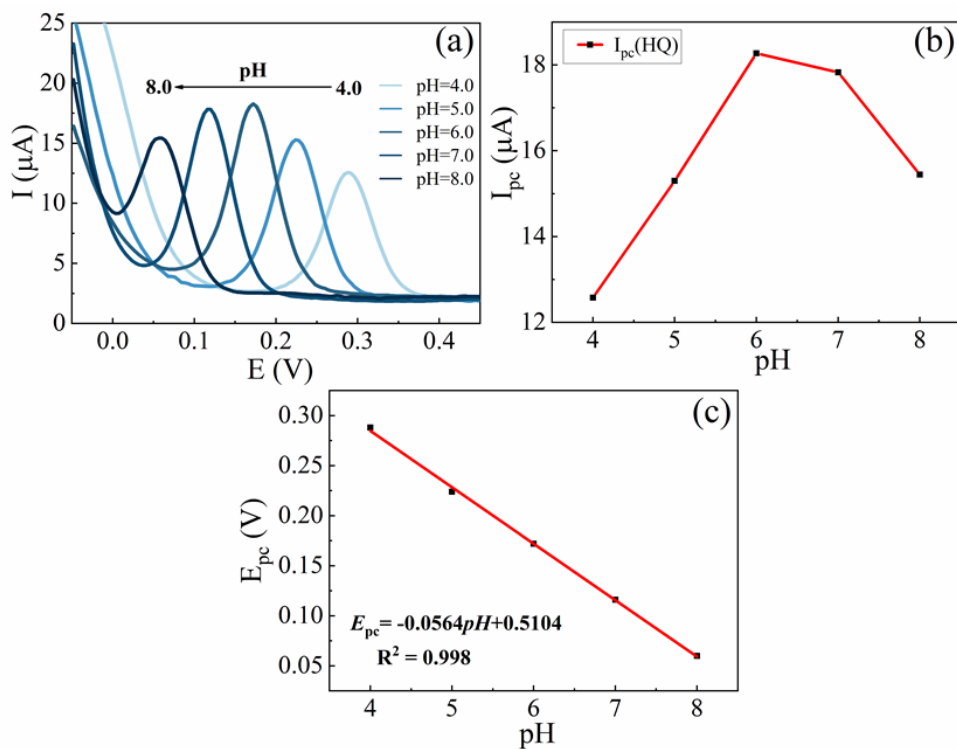

**Figure S4.** (a) The influence of PBS electrolyte solutions with different pH values on the DPV curve signal of 300 μM HQ; (b)  $I_{pa}$  vs. pH; (c)  $E_{pa}$  vs. pH.

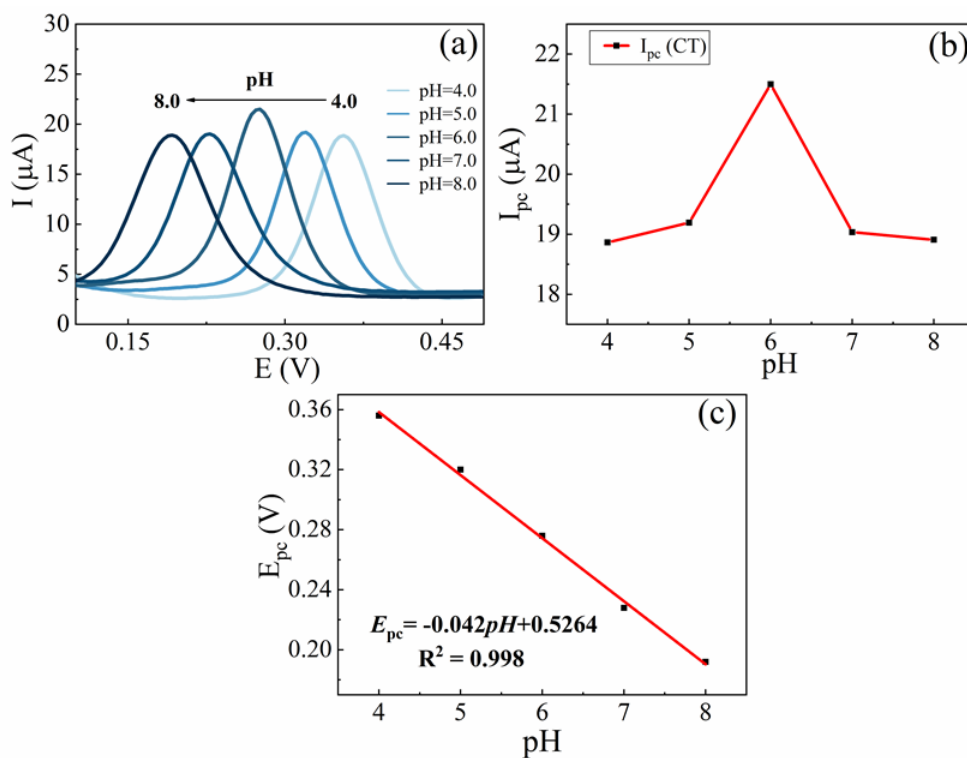

**Figure S5.** (a) The influence of PBS electrolyte solutions with different pH values on the DPV curve signal of 300 μM CT; (b)  $I_{pa}$  vs. pH; (c)  $E_{pa}$  vs. pH.

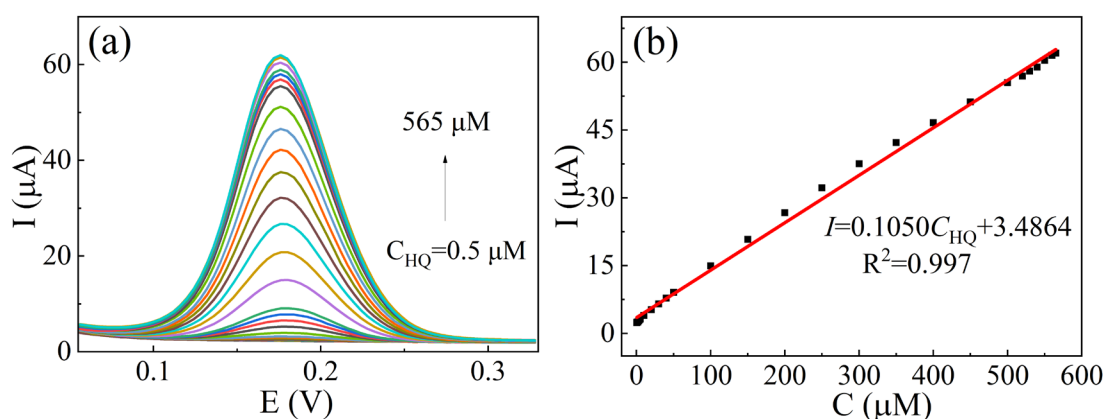

**Figure S6.** (a) DPV curves of HQ over a concentration scope 0–565  $\mu\text{M}$  on UiO-bpydc-Cu/MWCNTs/GCE (PBS pH 6.0). (b) The linear variation of  $I_p$  with the concentration of HQ.

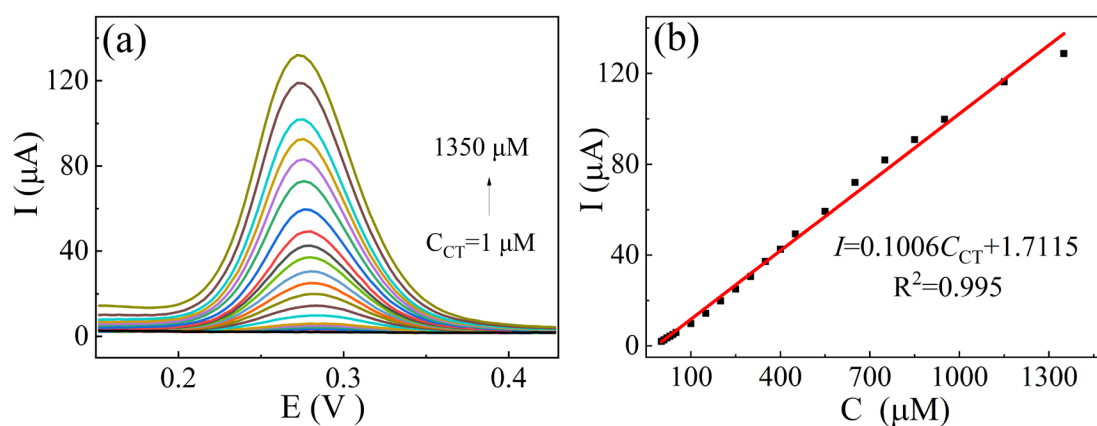

**Figure S7.** (a) DPV curves of CT over a concentration scope 0–1350  $\mu\text{M}$  on UiO-bpydc-Cu/MWCNTs/GCE (PBS pH 6.0). (b) The linear variation of  $I_p$  with the concentration of CT (PBS pH 6.0).

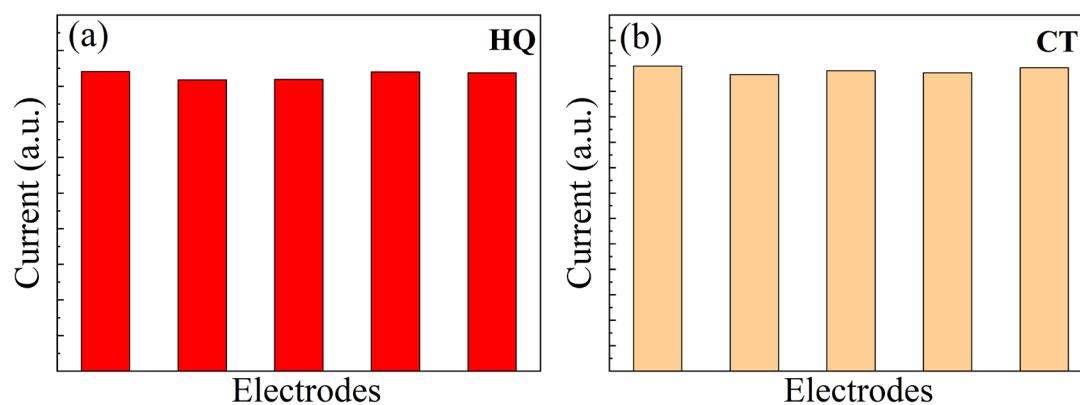

**Figure S8.** Histogram of the peak current of five UiO-bpydc-Cu/MWCNTs/GCE electrodes on (a) 300  $\mu\text{M}$  HQ and (b) 300  $\mu\text{M}$  CT by DPV.

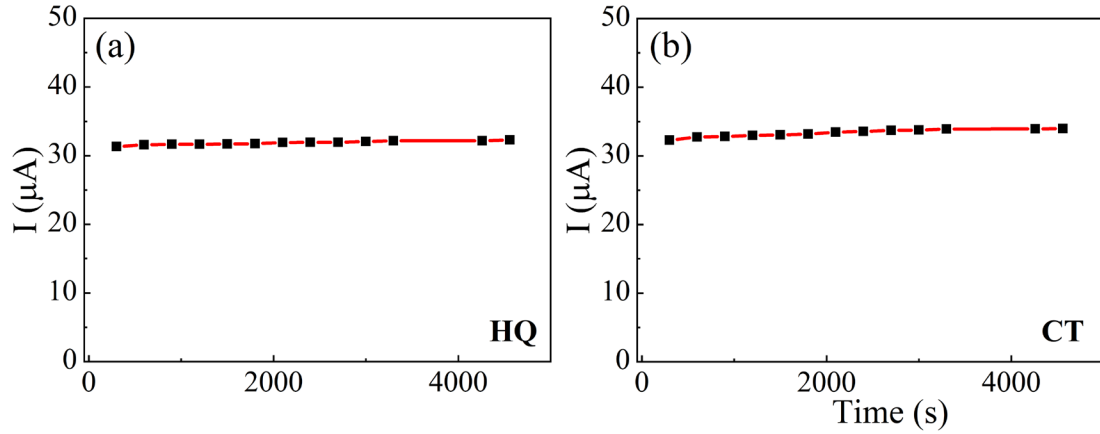

**Figure S9.** The peak current change of UiO-bpydc-Cu/MWCNTs/GCE electrode continuously tested 4500s in 300  $\mu\text{M}$  (a)HQ or (b) CT.

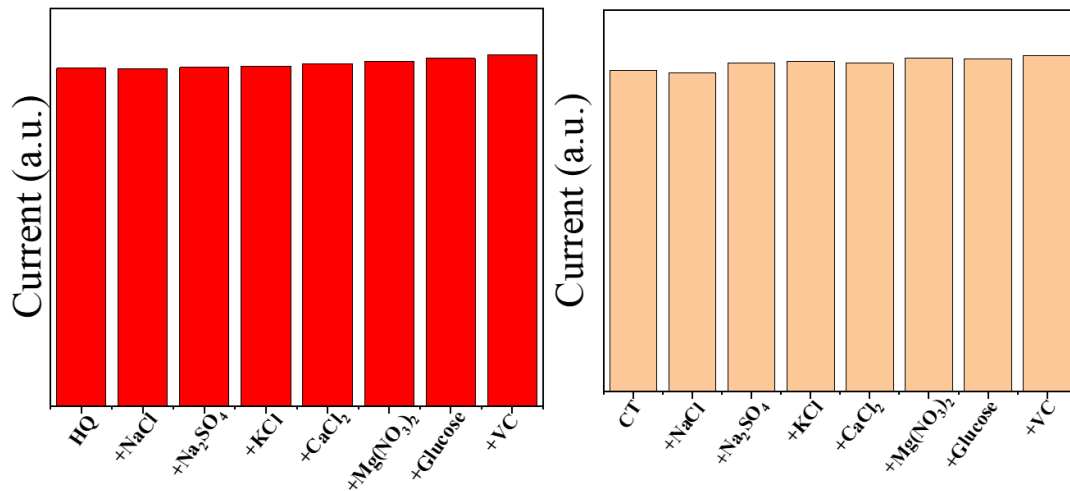

**Figure S10.** Histogram of peak current intensity of UiO-bpydc-Cu/MWCNTs/GCE after adding 200  $\mu\text{M}$  (a) HQ or (b) CT, 100-folds concentration (20 mM) of NaCl, Na<sub>2</sub>SO<sub>4</sub>, KCl, CaCl<sub>2</sub>, Mg(NO<sub>3</sub>)<sub>2</sub> and 10-folds concentration (2 mM) of Glucose and VC.

**Table S1. Performance of various electrodes for detecting HQ and CT**

| Sensors                         | Linear range ( $\mu\text{M}$ ) |          | LOD ( $\mu\text{M}$ ) |       | $\Delta E_{p(\text{CT-HQ})}$<br>(mV) | Refs      |
|---------------------------------|--------------------------------|----------|-----------------------|-------|--------------------------------------|-----------|
|                                 | HQ                             | CT       | HQ                    | CT    |                                      |           |
| MWCNT-NH <sub>2</sub> -AuNP/GCE | 4.3-150                        | 3.9-150  | 1.28                  | 1.06  | 100                                  | 3         |
| Pt/ZrO <sub>2</sub> -RGO/GCE    | 1-1000                         | 1-400    | 0.4                   | 0.4   | 111                                  | 4         |
| TACoPc/PANI/AgNPs               | 10-100                         | 10-100   | 0.60                  | 0.46  | 90                                   | 5         |
| c-MWCNTs/CTS/Au/GCE             | 0.5-1500                       | 5-900    | 0.17                  | 0.89  | 100                                  | 6         |
| Fe,N-CNs/GCE                    | 0.5-80                         | 0.5-80   | 0.17                  | 0.17  | 106                                  | 7         |
| SPE                             | 0.5-90                         | 0.5-90   | 0.12                  | 0.82  | 90                                   | 8         |
| OV-LDHs/H-MWCNTs/GCE            | 0.5-150                        | 0.5-150  | 0.076                 | 0.074 | 104                                  | 9         |
| PEDOT/GO/GCE                    | 2.5-200                        | 2-400    | 1.6                   | 1.6   | 100                                  | 10        |
| HMCCSs/GCE                      | 0.3-1000                       | 2.0-2000 | 0.12                  | 0.19  | 104                                  | 11        |
| UiO-bpydc-Cu/MWCNTs/GCE         | 0.5-565                        | 1-1350   | 0.361                 | 0.245 | 108                                  | This work |

**Table S2. Detection results of CT in detergent by the composite electrode**

|                                  | Sample | Detected ( $\mu\text{M}$ ) | Added ( $\mu\text{M}$ ) | Found ( $\mu\text{M}$ ) | Recovery (%) |
|----------------------------------|--------|----------------------------|-------------------------|-------------------------|--------------|
| CT in diluted detergent solution | 1      | 0                          | 100                     | 99.1                    | 99.1         |
|                                  | 2      | 0                          | 200                     | 193.2                   | 96.6         |
|                                  | 3      | 0                          | 300                     | 283.5                   | 94.5         |

## References

1. L. J. Li, S. F. Tang, C. Wang, X. X. Lv, M. Jiang, H. Z. Wu and X. B. Zhao, *Chem Commun*, 2014, **50**, 2304-2307.
2. Y. M. Song, D. H. Yang, S. N. Yu, X. S. Teng, Z. Chang, F. S. Pan, X. H. Bu, Z. Y. Jiang, B. Y. Wang, S. Wang and X. Z. Cao, *Separation and Purification Technology*, 2019, **210**, 258-267.
3. S. Piña, C. Candia-Onfray, N. Hassan, P. Jara-Ulloa, D. Contreras and R. Salazar, *Chemosensors*, 2021, **9**.
4. A. T. E. Vilian, S.-M. Chen, L.-H. Huang, M. A. Ali and F. M. A. Al-Hemaid, *Electrochimica Acta*, 2014, **125**, 503-509.
5. S. Malali Sudhakara, M. Chattanahalli Devendrachari, H. Makri Nimbegondi Kotresh and F. Khan, *Journal of Electroanalytical Chemistry*, 2021, **884**.
6. Y. Shen, D. Rao, Q. Sheng and J. Zheng, *Microchimica Acta*, 2017, **184**, 3591-3601.
7. Q. Wang, J. Zhang, N. Dou and J. Qu, *Journal of Electroanalytical Chemistry*, 2022, **913**.
8. A. C. d. Sá, S. C. Barbosa, P. A. Raymundo-Pereira, D. Wilson, F. M. Shimizu, M. Raposo and O. N. Oliveira, *Chemosensors*, 2020, **8**.
9. Z. Liu, D. Liao, J. Yu and X. Jiang, *Microchemical Journal*, 2022, **175**.
10. W. Si, W. Lei, Y. Zhang, M. Xia, F. Wang and Q. Hao, *Electrochimica Acta*, 2012, **85**, 295-301.
11. H. Ren, Y. Zhang, L. Liu, Y. Li, D. Wang, R. Zhang, W. Zhang, Y. Li and B. C. Ye, *Mikrochim Acta*, 2019, **186**, 306.
